# Supplementary material
Source: ML conference proceedings conference paper supplement (https://openreview.net/forum?id=SeWxE_Ljqeq)

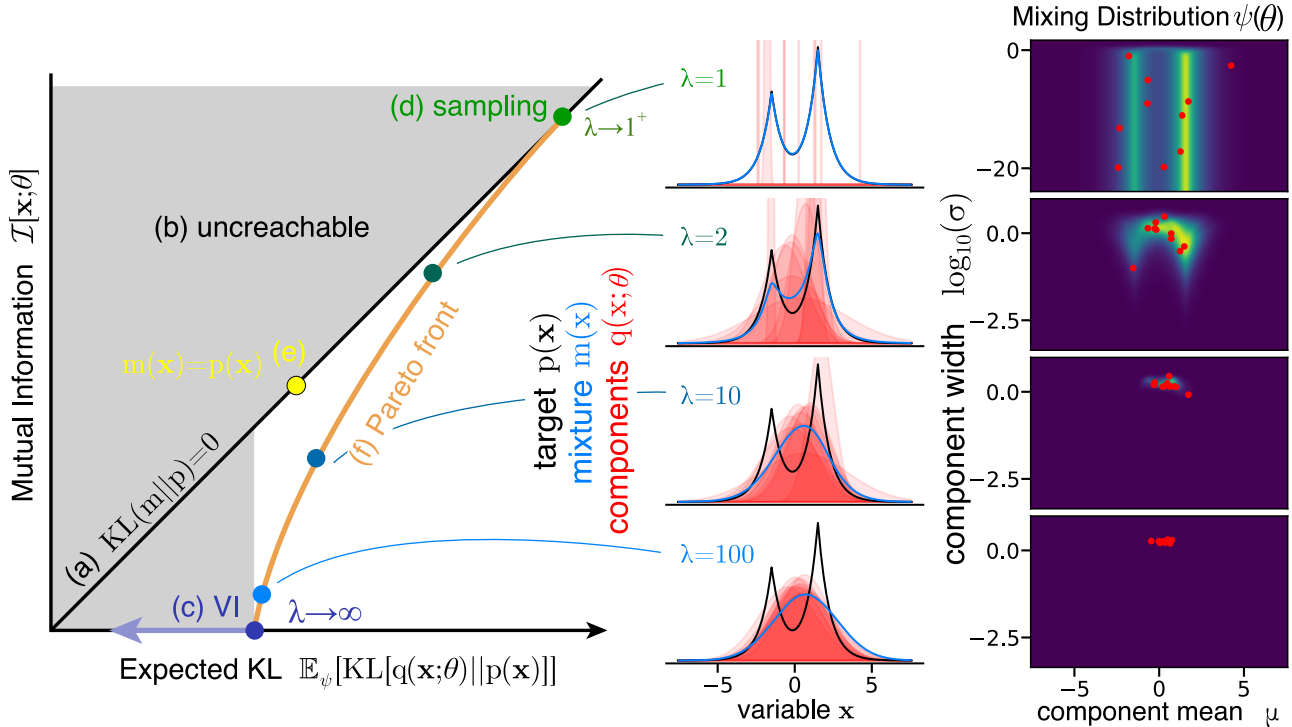

Supplement: supplementary_material [file attachment]

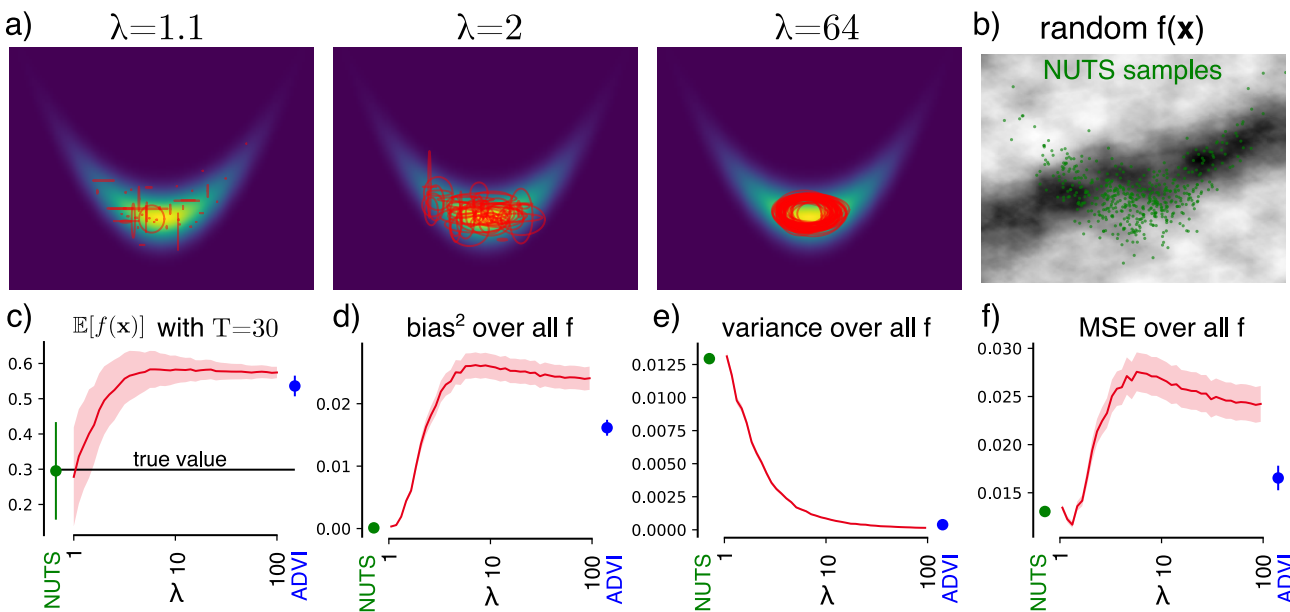

Supplement: supplementary_material [file attachment]

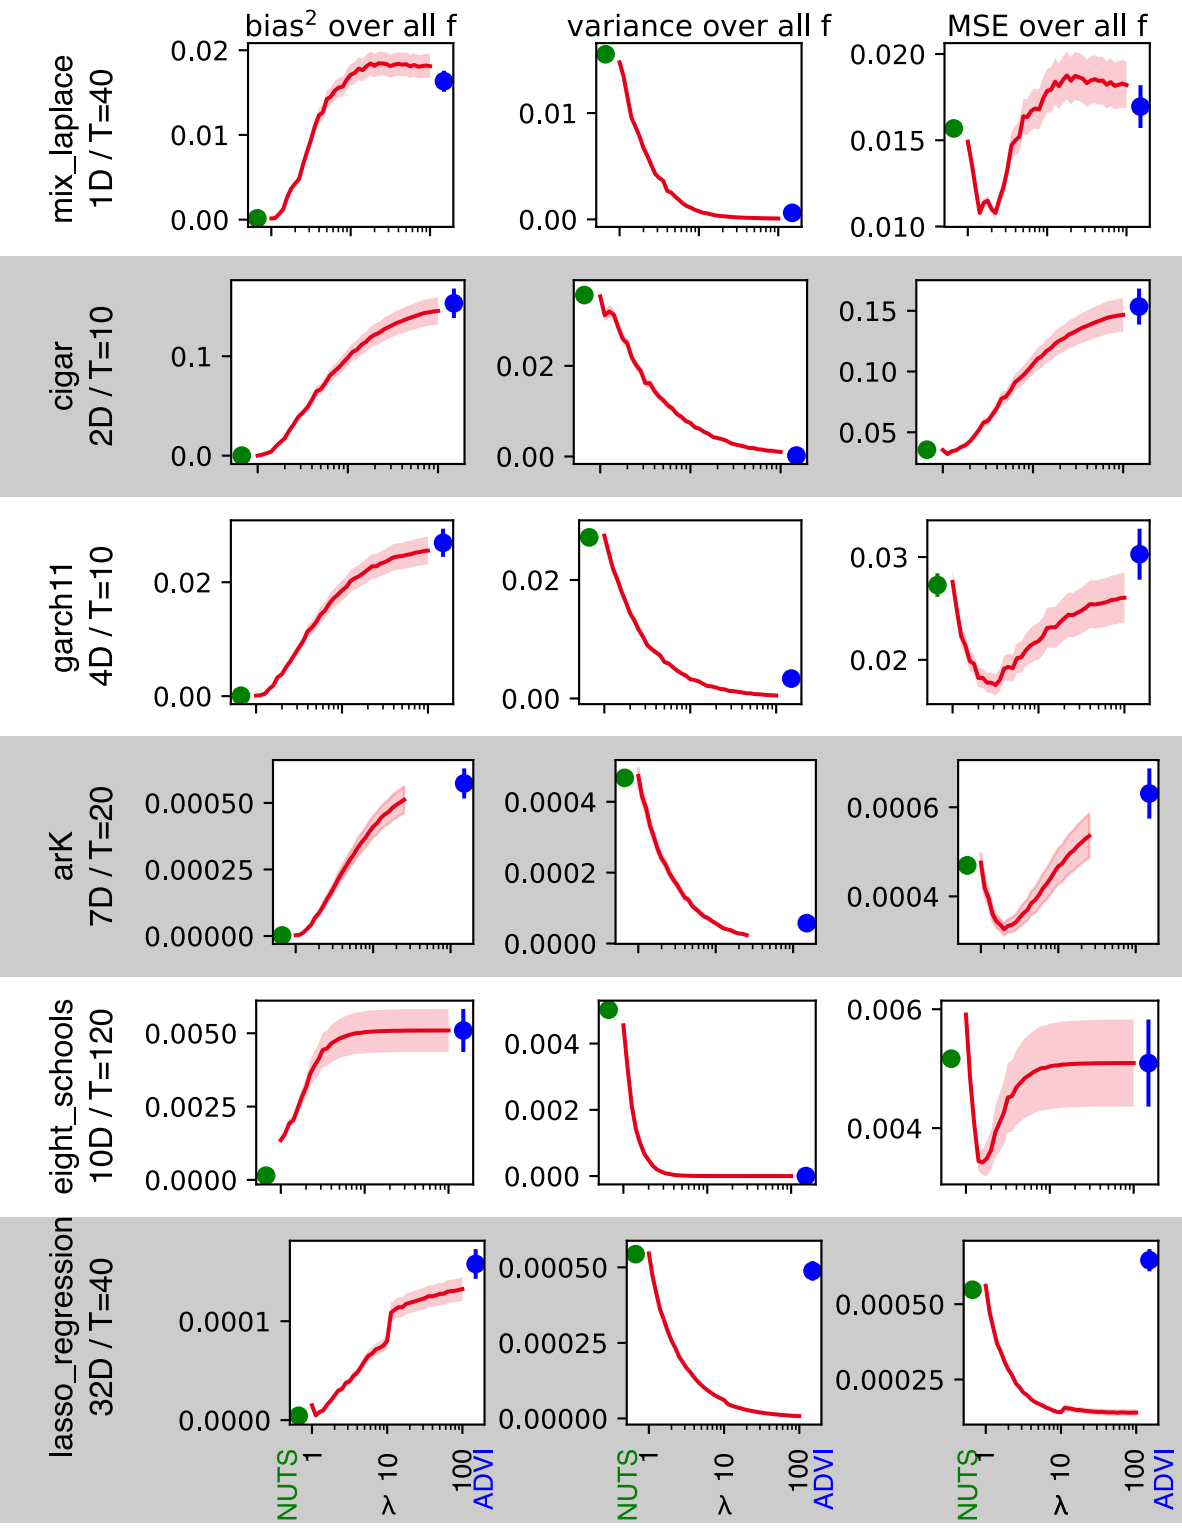

Supplement: supplementary_material [file attachment]

a)

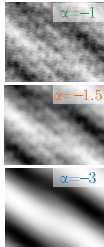

b)

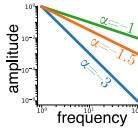

c)

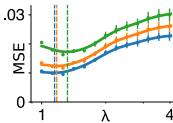

d)

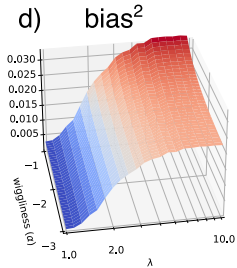

e)

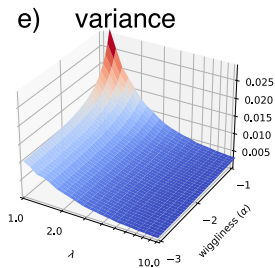

f)

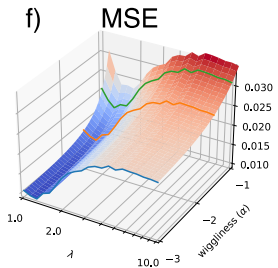

Supplement: supplementary_material [file attachment]

**a)**

Sampling

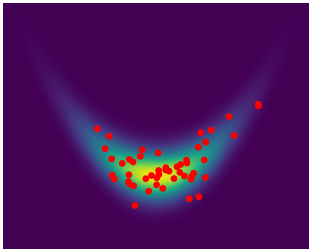

**b)** Variational Inference (VI)

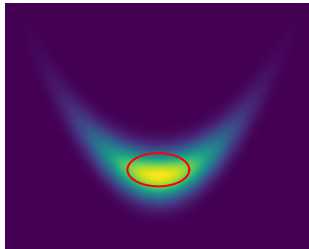

**c)** Proposed compromise

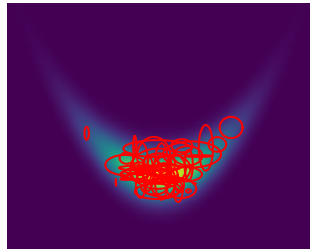

Supplement: supplementary_material [file attachment]
